# Supplementary material
Source: PubMed Central journal article supplement (PMC2292858)
Supplement: iai_76_4_1581__1.pdf [file iai_76_4_1581__1.pdf]

Supplemental Table 1

| Gene Name    | Feature ID | 4h<br>CAP+/NS | 4h<br>cap-/NS | 18h<br>CAP+/NS | 18h<br>cap-/NS |
|--------------|------------|---------------|---------------|----------------|----------------|
| I117r        | 99992_at   |               | -1.02         |                |                |
| Nfkbib       | 99982_at   |               |               |                | 1.66           |
| Prkrir       | 99975_at   |               |               |                | 1.19           |
| D0Kist4      | 99856_r_at |               |               |                | -1.63          |
|              | 99849_at   |               | 1.14          |                |                |
| Siat4a       | 99847_at   |               | 1.15          |                |                |
| Sfrs5        | 99628_at   |               | -1.38         |                |                |
| Top2a        | 99578_at   |               |               |                | -2.33          |
| Man2b1       | 99562_at   |               |               |                | -1.47          |
| Pla2g4a      | 99513_at   |               |               |                | -1.03          |
| Prkcb1       | 99510_at   |               |               |                | -1.07          |
| Hcls1        | 99461_at   | -1.37         |               |                |                |
| Mki67        | 99457_at   |               |               |                | -2.21          |
| Gphn         | 99441_at   |               |               |                | 1.01           |
| Cd83         | 99434_at   |               |               |                | 2.16           |
| Tnfaip3      | 99392_at   |               |               |                | 1.86           |
| 0610037M15R  | 99378_f_at |               |               |                | 1.29           |
| Csf2ra       | 99330_at   | -1.42         | -1.48         |                |                |
|              | 99128_at   |               |               | 1.69           | 1.34           |
|              | 99073_at   |               |               |                | -1.39          |
| Ccnf         | 99027_at   |               | 1.85          |                |                |
| Bcl2l1       | 99015_at   |               | 1.06          |                |                |
| Pml          | 98988_at   |               | 2.52          |                |                |
| Nfkbiz       | 98923_at   |               |               |                | 1.39           |
| Rcl1         | 98828_at   |               |               |                | -1.28          |
| Itgam        | 98822_at   |               |               |                | 1.52           |
| G1p2         | 98773_s_at |               |               |                | 2.41           |
| Irg1         | 98772_at   |               | -2.30         |                |                |
| Cxcl5        | 98586_at   |               | -1.10         |                |                |
| Nap1l1       | 98577_f_at | 1.48          |               |                |                |
| Pfdn5        | 98575_at   |               |               |                | -1.32          |
| Fasn         | 98524_f_at | 1.09          |               |                |                |
| Enc1         | 98500_at   |               | -1.37         |                |                |
| Il1rl1       | 98483_at   |               |               |                | 2.37           |
| Cacnb3       | 98478_at   |               | 1.17          |                |                |
| Ccng2        | 98465_f_at |               | 2.39          |                |                |
| Ifi204       | 98451_at   |               |               |                | 1.10           |
| Dnajb10      | 98447_at   |               |               |                | -1.08          |
| Cebpa        | 98436_s_at |               |               |                | 1.79           |
| Casp3        | 98432_at   |               |               |                | -1.28          |
| X99384       | 98417_at   |               |               |                | 1.45           |
| Mx1          | 98410_at   |               | 1.82          |                |                |
| Igtp         | 98406_at   |               |               |                | 2.51           |
| Ccl5         | 98405_at   |               |               |                | 2.28           |
| Serpinb9     | 98402_at   |               |               |                | -1.00          |
| Macf1        | 98400_at   |               |               |                | -1.07          |
| Solt         | 98398_s_at |               | 1.10          |                |                |
| Apobec1      | 98384_at   |               |               |                | 2.33           |
| Ptk6         | 98338_at   |               |               |                | 1.93           |
| En2          | 98146_at   |               |               |                | 1.01           |
| Nup88        | 98099_at   |               |               |                | 1.03           |
| Nudt9        | 98088_at   |               | 1.12          |                | 1.26           |
| Cd14         | 98083_at   |               |               |                | 1.24           |
| Copeb        | 98067_at   |               |               |                | 1.48           |
| Cdkn1a       | 98055_at   |               |               |                | 1.26           |
| Blcap        | 98030_at   |               | 1.24          |                | 1.11           |
| Trim30       | 98002_at   |               | 1.12          |                | 2.46           |
| Icsbp1       | 97976_at   |               |               |                | 1.04           |
| Ktn1         | 97911_at   |               | -1.30         |                |                |
| 0910001L09Ri | 97888_at   |               |               |                | 1.23           |
| Rhog         | 97874_at   |               |               | 1.04           |                |
| 1500032D16R  | 97834_g_at | -1.31         |               |                | 1.03           |
| Pfkip        | 97819_at   |               |               |                | 1.19           |
| Gsto1        | 97783_at   | -1.38         |               |                | 2.07           |
| Ccl17        | 97519_at   |               | 1.02          |                |                |
| Spp1         | 97515_at   |               |               |                | -1.08          |
| Hsd17b4      | 97504_at   |               |               |                | 1.92           |
| Ccnd2        | 97489_at   |               | -1.14         |                |                |
| Pygb         | 97462_at   |               | -1.10         |                |                |
| 3110006P09R  | 97444_at   |               | -1.58         |                |                |
| Ifi30        | 97426_at   |               |               |                | -1.17          |
| Emp1         | 97421_at   |               |               |                | -1.33          |
| Smc2l1       | 97411_at   |               |               |                | -1.41          |
| Ect2         | 97409_at   |               | 2.00          |                |                |
| Ifi1         | 97393_at   |               |               |                | -1.39          |
| Vrk1         | 97346_at   |               |               |                | 1.31           |
| 2610001J05Ri | 97296_at   |               |               |                | 1.03           |
| Mrpl44       | 97253_at   |               |               |                | 1.32           |
| Tpd52l2      | 97228_at   |               |               |                | 1.41           |
| Lzf          | 97203_at   |               | 1.28          |                | 1.73           |
| Mlp          | 97173_f_at |               |               |                | 1.43           |
| Map3k8       | 97106_at   |               |               |                | 1.26           |
| Psama6       | 96952_at   |               |               |                | 1.14           |
| 9330101J02Ri | 96909_at   |               |               | 1.03           |                |
| 0610013D04R  | 96785_at   |               | -1.50         |                |                |
| Anln         | 96784_at   |               |               |                | -1.92          |
| Icam1        | 96752_at   |               |               |                | 1.88           |
| Auh          | 96650_at   |               |               |                | 1.15           |
| 5730536A07R  | 96613_at   |               | -1.46         |                |                |
| Ndrp1        | 96596_at   |               |               |                | 1.65           |
| Tor3a        | 96533_at   |               | 1.69          |                |                |
| Nup62        | 96515_at   |               | 1.58          |                | 2.60           |
| Cdc20        | 96319_at   |               |               |                | -1.20          |
| 1110020C13R  | 96278_at   |               |               |                | 1.46           |
| 2310075C12R  | 96271_at   |               |               |                | 1.23           |
| Daxx         | 96125_at   |               | 1.57          |                |                |
| Mrpl36       | 96098_at   |               | -1.02         |                |                |
| Hnrpd1       | 96084_at   |               | -1.00         |                |                |
|              | 96068_at   |               |               |                | 1.82           |
| Serpinb6a    | 96060_at   |               |               |                | 1.03           |
| Rhoc         | 96056_at   |               |               |                | 1.03           |
| C1qb         | 96020_at   |               |               |                | -1.19          |
| Sri          | 96004_at   |               |               |                | 1.18           |
| Supt4h1      | 95796_g_at |               |               |                | 1.31           |
| Supt4h1      | 95795_at   |               |               |                | 2.11           |
|              | 95775_f_at |               |               |                | -1.03          |
| Scd2         | 95758_at   |               |               |                | -1.28          |

|              |            |       |       |       |
|--------------|------------|-------|-------|-------|
| 1200015A19R  | 95737_at   |       |       | 1.35  |
| Basp1        | 95673_s_at |       |       | 1.02  |
| 5830411E10R  | 95655_at   |       |       | 1.47  |
| Stard3       | 95607_at   |       | 1.22  |       |
| BC018601     | 95564_at   | 1.11  |       |       |
| Rab3ip       | 95539_at   |       | 1.00  |       |
| Rab9         | 95516_at   |       |       | 1.03  |
| Tipin        | 95497_at   |       | -1.08 |       |
| Egln1        | 95468_at   |       | -1.00 |       |
| 2810405J04Ri | 95451_at   |       |       | -1.19 |
| Cai          | 95423_at   |       |       | -1.95 |
| C1r          | 95415_f_at |       |       | -1.06 |
| Sema4b       | 95387_f_at | -1.21 |       |       |
| A430106J12Ri | 95289_r_at |       |       | 1.82  |
| A430106J12Ri | 95288_i_at |       |       | 2.13  |
| Asns         | 95133_at   |       | 1.03  |       |
| Tm4sf13      | 95120_at   |       |       | 1.24  |
| 1110038D17R  | 95119_at   |       |       | 1.38  |
| Kif22        | 95118_r_at |       |       | -1.56 |
| Cdca7        | 95063_at   |       |       | -1.59 |
| Prc1         | 95032_at   |       |       | -1.03 |
| Usp18        | 95024_at   |       | 1.99  | 1.18  |
| Itpr1        | 94977_at   |       |       | -1.08 |
| Ptpn1        | 94929_at   | -1.06 |       |       |
| Cdkn1a       | 94881_at   |       |       | 1.18  |
| Tubb2        | 94835_f_at |       | -1.67 |       |
| Hist1h2ai    | 94805_f_at |       |       | -1.23 |
| D030034H08   | 94784_at   |       |       | -1.23 |
| Scya7        | 94761_at   |       | 3.50  |       |
| I11a         | 94755_at   |       | 2.77  | 1.96  |
| Gna15        | 94753_at   |       |       | -1.10 |
|              | 94745_f_at |       |       | 1.17  |
| Klk9         | 94716_f_at |       |       | -1.24 |
| Peli1        | 94505_at   |       | 1.05  | 1.18  |
| Sgpp1        | 94501_at   |       |       | -1.25 |
| Casp6        | 94458_at   |       | -1.05 |       |
| Inpp5b       | 94399_at   |       |       | 1.04  |
| Inpp5b       | 94398_s_at |       |       | 1.23  |
| Akap8        | 94390_at   |       | -1.50 |       |
| Ide          | 94380_at   |       |       | -1.25 |
| Dctn2        | 94299_at   |       |       | 1.28  |
| Ccnb2        | 94294_at   |       |       | -1.57 |
| Ubl5         | 94267_i_at |       |       | 1.04  |
| Clic4        | 94256_at   |       |       | 1.41  |
| Clic4        | 94255_g_at |       |       | 1.51  |
| Ifi202b      | 94224_s_at |       |       | 1.12  |
| Grcc8        | 94217_f_at |       |       | -1.25 |
| Txnrc7       | 94209_g_at |       |       | -1.10 |
| Txnrc7       | 94208_at   |       |       | -1.17 |
| Scya4        | 94146_at   |       | 4.49  |       |
| Prg1         | 94085_at   |       |       | 1.19  |
| Crip1        | 94061_at   |       | -1.01 | 1.07  |
| Scd1         | 94056_at   |       |       | -1.06 |
| Cnn2         | 94004_at   |       |       | 1.62  |
| Psmc12       | 93971_f_at |       |       | 1.41  |
| Ifit3        | 93956_at   |       | 3.78  |       |
| Cd80         | 93906_s_at |       |       | 2.10  |
| Cd80         | 93905_at   |       |       | 2.22  |
| Bcl2a1d      | 93869_s_at |       |       | 1.26  |
| Cxcl10       | 93858_at   |       | 5.02  |       |
| Ifi2         | 93823_at   |       |       | 1.04  |
| 5031415C07R  | 93779_at   |       | 1.38  | 1.90  |
| Iars         | 93752_at   |       |       | -1.16 |
| Tcn2         | 93736_at   |       |       | -1.13 |
| Ccl12        | 93717_at   |       | 1.49  |       |
| Pias3        | 93708_at   |       |       | 1.04  |
| Cd5          | 93637_at   |       | 1.74  |       |
| Ccrl2        | 93617_at   |       | 2.01  |       |
| Syngn2       | 93586_at   |       |       | 1.16  |
| A1326478     | 93583_s_at |       |       | -1.39 |
| Mt1          | 93573_at   |       |       | 1.01  |
| Ndufa8       | 93531_at   |       | -1.13 |       |
| C3           | 93497_at   |       |       | 1.36  |
| Srr          | 93488_at   |       |       | -1.04 |
| 9130211I03Ri | 93465_at   |       |       | 1.05  |
| Bmp2k        | 93376_at   |       |       | 1.53  |
| Tep1         | 93367_at   |       |       | -1.57 |
| Sugt1        | 93366_r_at |       |       | 1.44  |
| Mcm7         | 93356_at   |       |       | -1.84 |
| Timm22       | 93348_at   |       |       | 1.17  |
| Hdc          | 93328_at   |       | 2.68  |       |
| Polr2e       | 93325_at   |       |       | 1.10  |
| Zfp361       | 93324_at   |       |       | 1.29  |
| Ifi203       | 93321_at   |       | 2.03  |       |
| Rasa3        | 93319_at   |       |       | -1.30 |
| Dusp6        | 93285_at   |       |       | -1.45 |
| A130022J15Ri | 93175_at   |       |       | -1.05 |
| Mcm2         | 93112_at   |       |       | -1.63 |
| Kpnb1        | 93111_at   |       |       | -1.02 |
| Btg1         | 93104_at   |       |       | 1.38  |
| Za20d3       | 93082_at   |       |       | 1.13  |
| 1110054N06R  | 93055_at   |       | -1.02 |       |
| Mcm4         | 93041_at   |       |       | -1.52 |
| Idb2         | 93013_at   |       |       | 1.96  |
| Cadps        | 92989_f_at |       |       | 1.24  |
| Cadps        | 92988_i_at |       |       | 1.81  |
| Tnfrsf5      | 92962_at   |       | 1.50  | 1.89  |
| Trim21       | 92942_at   |       |       | 1.27  |
| Prdm1        | 92904_at   |       |       | 1.49  |
| Tgfb1        | 92877_at   |       | -1.90 |       |
| Phc2         | 92867_at   |       |       | 1.05  |
| Ccl6         | 92849_at   |       | -1.72 |       |
| Fscn1        | 92838_at   |       |       | 1.30  |
| Socs1        | 92832_at   |       |       | 1.10  |
| Zfp36        | 92830_s_at |       |       | 1.52  |
| Tnfrsf1a     | 92793_at   |       |       | -1.01 |
| Irf4         | 92737_at   |       |       | 1.36  |
| Mertk        | 92698_at   |       |       | 1.41  |
| Stxbp3       | 92648_at   |       |       | 1.99  |
| Aurka        | 92639_at   |       |       | -1.24 |

|             |             |       |      |       |
|-------------|-------------|-------|------|-------|
| Map2k1      | 92615_at    | -1.03 |      | 1.04  |
|             | 92585_at    |       |      | 1.31  |
| Esd         | 92553_at    |       |      | 2.05  |
| Tnfsf9      | 92415_at    | 2.05  |      | 1.03  |
| Ltc4s       | 92401_at    |       |      | -1.11 |
| Ptpn8       | 92356_at    |       |      | 2.10  |
| Plk2        | 92310_at    | 2.10  |      | 1.31  |
| Ikbke       | 92301_at    |       |      | 1.29  |
| Arl5        | 92294_at    |       |      | -1.15 |
| Cfh1        | 92291_f_at  |       |      | -1.17 |
| Fdft1       | 92256_at    |       |      | 1.62  |
| AI607873    | 92251_f_at  | 1.62  |      | 2.42  |
| Nr4a2       | 92249_g_at  | 2.42  |      | 1.90  |
| Nr4a2       | 92248_at    | 1.90  |      | 1.57  |
| Socs3       | 92232_at    | 1.57  |      | -1.15 |
| C1qg        | 92223_at    |       |      | -1.47 |
| A430107D22R | 92206_at    |       |      | 1.02  |
| Cd6         | 92204_at    | 1.02  |      | -1.60 |
| AI467657    | 92202_g_at  |       |      | 1.65  |
| Stat5b      | 92199_at    |       |      | 1.05  |
| Ft1         | 162479_f_at |       | 1.05 |       |
| Ddx17       | 162424_f_at | -1.04 |      | 1.41  |
|             | 162262_f_at |       |      | 1.31  |
| Socs3       | 162206_f_at | 1.31  |      | 1.20  |
| Notch1      | 162204_r_at |       | 1.20 |       |
| Irf7        | 162202_f_at | 1.15  |      |       |
| Ccl6        | 162198_f_at | -1.05 |      |       |
| Tax1bp3     | 162014_i_at | 1.24  |      |       |
| Lsp1        | 161914_s_at |       |      | 1.21  |
| Gadd45b     | 161666_f_at | 2.19  |      | 2.86  |
| G1p2        | 161511_f_at |       |      | 2.27  |
| Lman2       | 161472_r_at | 1.10  |      |       |
| Scel        | 161132_at   |       |      | -1.00 |
| Ndufab1     | 161122_f_at |       | 1.23 | 1.12  |
| Trib3       | 161067_at   | 1.30  |      |       |
| 4633402D15R | 160992_at   |       |      | 1.02  |
| C330027C09R | 160973_at   |       |      | -1.21 |
| Odf2        | 160970_at   | -1.30 |      |       |
| Rasa4       | 160965_at   |       |      | 1.21  |
| Ddhd1       | 160935_at   |       |      | 1.20  |
| Igtp        | 160933_at   | 2.19  |      |       |
| Dnm1l       | 160931_at   |       |      | 1.01  |
| BC005662    | 160897_at   |       |      | 1.58  |
| Lbr         | 160890_at   |       |      | -1.21 |
| Phlda1      | 160829_at   |       |      | 1.12  |
| BC032204    | 160815_at   |       |      | -1.07 |
| Stk39       | 160806_at   |       |      | 1.08  |
| 1300007C21R | 160799_at   | 1.63  |      |       |
| Kif2c       | 160755_at   |       |      | -1.72 |
| Elf1        | 160721_at   | -1.20 |      |       |
| AW146242    | 160715_at   |       |      | 1.91  |
| Ogfr        | 160668_at   | 1.59  |      |       |
| Cdk7        | 160658_at   |       |      | -1.05 |
| Cpd         | 160655_at   |       |      | -1.05 |
| Gsr         | 160646_at   | -1.44 |      |       |
|             | 160640_at   |       | 1.07 | 1.40  |
| Tra1        | 160499_at   |       |      | -1.00 |
| Mcm3        | 160496_s_at |       |      | -1.28 |
| Tnfaip2     | 160489_at   | 1.59  |      |       |
| Cat         | 160479_at   | -1.73 |      | 1.14  |
| Thbs1       | 160469_at   |       |      | 1.12  |
| Ndrgr1      | 160464_s_at |       |      | 1.37  |
| Nol7        | 160398_at   |       | 1.35 |       |
| Etnk1       | 160393_at   | 1.03  |      |       |
| Fads1       | 160391_at   |       |      | -1.03 |
| Cd34        | 160358_at   |       |      | -1.66 |
| Cpeb1       | 160273_at   |       |      | -1.60 |
|             | 160254_at   |       |      | -1.16 |
| Cox17       | 160230_at   |       |      | 1.26  |
| Gtf2b       | 160225_at   |       |      | 1.07  |
| Dnajc9      | 160203_at   |       |      | -1.14 |
| Slc33a1     | 160201_r_at |       |      | 2.11  |
| Acate3      | 160171_f_at |       |      | 1.25  |
| Mglap       | 160119_at   |       |      | -1.20 |
| Gmnn        | 160069_at   | -1.16 |      |       |
| Olfir56     | 104750_at   | 2.38  |      | 1.01  |
| Pros1       | 104728_at   |       |      | -1.48 |
| Myc         | 104712_at   |       |      | -1.63 |
| Irf7        | 104669_at   |       |      | 1.07  |
| Lifr        | 104659_g_at |       |      | -1.79 |
| Snx14       | 104651_at   | -1.16 |      |       |
| Kif4        | 104644_at   |       |      | -1.47 |
| Dnajb6      | 104625_at   |       |      | 1.04  |
| Gpc1        | 104614_at   |       |      | 1.15  |
| Dusp1       | 104598_at   |       |      | 1.85  |
| Rad51       | 104527_at   |       |      | -1.45 |
| Ch25h       | 104509_at   | 3.84  |      |       |
| 4921515A04R | 104494_at   |       |      | 1.22  |
|             | 104467_at   |       |      | -1.52 |
| Ccr7        | 104443_at   |       |      | 3.56  |
| AA407659    | 104434_at   |       |      | -1.06 |
| 1300010A20R | 104398_at   |       |      | 1.75  |
| Ccl9        | 104388_at   |       |      | 1.47  |
| Pon2        | 104378_at   | -1.11 |      |       |
| Csf1r       | 104354_at   |       |      | -1.09 |
| Aqp9        | 104328_at   |       |      | 1.04  |
| Zdhhc14     | 104299_at   |       |      | -1.32 |
| 1110031M08R | 104296_at   | -1.08 |      |       |
| 5031439G07R | 104284_at   |       |      | -1.01 |
| Tbc1d15     | 104283_at   |       |      | 2.07  |
| Pscdbp      | 104256_at   |       |      | 1.66  |
| Snx5        | 104225_at   |       |      | -1.03 |
| Slc7a8      | 104214_at   |       |      | -1.25 |
| Cyhr1       | 104209_at   |       |      | 1.03  |
| Traf6       | 104189_at   |       |      | 1.40  |
| Hgfac       | 104182_at   |       |      | -1.06 |
| Rsad2       | 104177_at   | 4.93  |      |       |
| Cpsf2       | 104161_at   |       |      | -1.11 |
| Atf3        | 104156_r_at | 1.77  |      |       |
| Atf3        | 104155_f_at | 2.79  |      | 1.19  |

|             |             |       |       |       |
|-------------|-------------|-------|-------|-------|
| Nfkbia      | 104149_at   |       | 1.09  | 1.74  |
| Gtpbp2      | 104144_at   |       | 1.11  |       |
| 2310040A13R | 104117_at   |       |       | -1.08 |
| Rab21       | 104112_at   |       |       | 1.14  |
| AA606869    | 104104_at   |       |       | 1.26  |
| Bub1        | 104097_at   |       |       | -1.87 |
| 8430420C20R | 103916_at   |       |       | 1.41  |
| Centg3      | 103900_at   |       |       | -1.03 |
| Eli2        | 103891_i_at |       |       | 1.28  |
| Prpf31      | 103885_at   | -1.17 |       |       |
|             | 103863_at   |       | 1.12  |       |
| 2900001004R | 103852_at   |       |       | 1.19  |
| Cdc6        | 103821_at   |       | -1.24 | -1.67 |
| D5Ert135e   | 103786_at   |       |       | 2.38  |
| BC037034    | 103738_at   |       |       | -1.30 |
|             | 103736_at   |       |       | -2.02 |
| Scin        | 103715_at   |       |       | 2.05  |
| A230075M04R | 103697_at   |       |       | -1.25 |
|             | 103685_at   |       |       | -1.08 |
| Lancl1      | 103656_at   |       |       | 1.08  |
| Ifit2       | 103639_at   |       | 4.73  |       |
| Fnbp1       | 103638_at   |       |       | 1.04  |
| 2810407K09R | 103631_at   |       |       | 1.17  |
| Nfkb2       | 103614_at   |       | 1.47  | 1.64  |
| Cd47        | 103611_at   |       |       | 1.11  |
| Dgka        | 103596_at   |       |       | 1.24  |
| Ablim1      | 103574_at   |       |       | -1.22 |
| Ibrdc3      | 103563_at   |       |       | 1.10  |
| Ralgps1     | 103556_at   |       | 1.25  |       |
| AI573938    | 103547_at   |       |       | 1.23  |
| Tnfrsf9     | 103509_at   |       |       | 2.34  |
| Ii1b        | 103486_at   |       | 1.64  |       |
| Tbc1d15     | 103471_at   |       |       | 1.79  |
| Ptk2b       | 103451_at   |       |       | -1.08 |
| Ifih1       | 103446_at   |       | 2.70  |       |
| Dna2l       | 103444_at   |       |       | -1.23 |
| Aim1        | 103443_at   |       |       | 1.13  |
| Isg20       | 103432_at   |       | 2.41  |       |
| AL024210    | 103429_i_at | 1.46  |       |       |
| Cd1d1       | 103422_at   |       |       | 2.33  |
| Rfc4        | 103418_at   |       | -1.16 |       |
| Adcy7       | 103392_at   |       |       | -1.47 |
| Tera        | 103385_at   |       |       | 1.03  |
| Ptger4      | 103362_at   |       |       | 1.66  |
| Ctps        | 103341_at   |       |       | -1.01 |
| AI132321    | 103299_at   |       |       | -1.04 |
|             | 103273_s_at |       |       | -1.24 |
| Mtmr1       | 103264_at   |       |       | 1.81  |
| Fln29       | 103254_at   |       | 1.06  |       |
| Dfna5h      | 103250_at   |       | -1.40 |       |
| Rhoh        | 103231_at   |       |       | -1.01 |
| Cflar       | 103217_at   |       | 2.48  |       |
| BC006933    | 103212_at   |       |       | -1.19 |
| Pola1       | 103207_at   |       |       | -1.37 |
| 4432406C08R | 103204_r_at |       |       | -1.66 |
| Relb        | 103091_at   |       | 1.53  | 1.79  |
| Samhd1      | 103080_at   |       |       | 1.03  |
| Topbp1      | 103071_at   |       |       | -1.19 |
| Chek1       | 103064_at   |       |       | -1.37 |
| Cd83        | 103040_at   |       |       | 3.46  |
| Tap1        | 103035_at   |       | 1.04  |       |
| Pdcd4       | 103029_at   |       |       | 2.40  |
| Mov10       | 103025_at   |       |       | 1.27  |
| Map3k1      | 103021_r_at |       |       | 1.11  |
| Map3k1      | 103020_s_at |       |       | 1.46  |
| Cd68        | 103016_s_at |       | -1.09 |       |
| AI481105    | 102965_at   |       | 2.00  |       |
| Nfil3       | 102955_at   |       |       | 2.07  |
| Tgtp        | 102906_at   |       | 2.90  |       |
| Sybl1       | 102885_at   |       |       | 1.05  |
| Inpp5d      | 102884_at   |       |       | -1.42 |
| Pkib        | 102858_at   |       |       | 1.67  |
| Plscr1      | 102839_at   |       |       | 1.10  |
|             | 102831_s_at |       |       | 1.09  |
| Ext1        | 102811_at   |       |       | 1.10  |
| Cxcr4       | 102794_at   |       |       | 1.61  |
| Ung         | 102792_at   |       | -1.16 |       |
| Gadd45b     | 102779_at   |       |       | 2.04  |
| Tgfb3       | 102751_at   | 1.05  | 1.92  |       |
| Edn1        | 102737_at   |       | 3.37  |       |
| Birc2       | 102734_at   |       |       | 1.31  |
| Saa3        | 102712_at   |       |       | 1.62  |
| Mx2         | 102699_at   |       | 2.70  |       |
| Klk26       | 102693_f_at |       |       | 1.14  |
| Tnf         | 102629_at   |       | 3.80  |       |
| Ccl3        | 102424_at   |       | 4.24  |       |
| Dnajc3      | 102415_r_at |       |       | -1.15 |
| Irf1        | 102401_at   |       | 1.99  |       |
| Junb        | 102363_r_at |       |       | 1.11  |
| D1Bwg0491e  | 102336_at   |       |       | 1.49  |
| Adcy6       | 102321_at   |       |       | 1.36  |
| Siat8d      | 102318_at   |       |       | 2.04  |
| Gch1        | 102313_at   |       |       | 1.14  |
| Ccl22       | 102310_at   |       | 1.43  | 2.42  |
| Tiam1       | 102283_at   |       |       | -1.21 |
| Sifn1       | 102264_at   |       | 1.09  |       |
| Gprk5       | 102217_at   |       | 1.19  |       |
| Nfatc1      | 102209_at   |       | 1.25  |       |
| 1810027D10R | 102104_f_at |       | 1.27  |       |
| Ii16        | 102029_at   |       |       | -1.11 |
| Mrpl13      | 102019_at   |       |       | 1.25  |
| Rrm2        | 102001_at   |       |       | -1.28 |
| Ptpn2       | 101996_at   |       |       | 1.04  |
| Sqstm1      | 101995_at   | -1.29 |       |       |
| Cited2      | 101973_at   |       | 1.29  |       |
| Tfdp1       | 101959_r_at |       |       | -1.19 |
| Ptpre       | 101932_at   |       |       | -1.13 |
| Cd1d2       | 101897_g_at |       |       | 1.45  |
| Fts         | 101894_s_at |       |       | 1.03  |
| Fts         | 101892_f_at |       |       | 1.20  |

|             |             |       |       |       |
|-------------|-------------|-------|-------|-------|
| H2-DMb1     | 101868_i_at | -1.79 | -1.54 |       |
| Sp100       | 101848_g_at |       | 1.25  | 1.08  |
| Lrmp        | 101835_at   |       |       | -1.12 |
| Lzp-s       | 101753_s_at |       | -1.86 |       |
| H2-Q8       | 101658_f_at |       |       | 1.16  |
| Btg2        | 101583_at   |       | 1.22  |       |
| Emb         | 101560_at   |       | -1.10 | -1.20 |
| NKfbia      | 101554_at   |       | 1.16  | 1.71  |
| Tes         | 101551_s_at |       |       | 1.58  |
| Stat1       | 101465_at   |       |       | 1.02  |
| Csf1        | 101450_at   |       | 2.50  |       |
| Dnmt1       | 101445_at   |       |       | -1.34 |
| Ddit3       | 101429_at   |       | 1.29  |       |
| Cerk        | 101426_at   |       |       | -1.05 |
| Anxa3       | 101393_at   |       | -1.49 | 2.10  |
| Adora2a     | 101363_at   |       |       | 1.43  |
|             | 101350_g_at |       |       | -1.30 |
|             | 101300_at   |       |       | 1.02  |
| C76746      | 101221_at   |       |       | -1.72 |
| Cxcl2       | 101160_at   |       |       | 2.33  |
| Capn2       | 101040_at   |       | -1.22 |       |
| Ifnar2      | 101014_at   | 1.13  |       |       |
| Itgb1bp1    | 100990_g_at |       |       | 1.01  |
| Ifit1       | 100981_at   |       | 4.63  |       |
| Cstf3       | 100968_at   |       |       | 1.03  |
| Serpind1    | 100966_at   |       | 1.74  |       |
| Nab2        | 100962_at   |       | 1.24  |       |
| Spata13     | 100958_at   |       |       | -1.01 |
| Ank         | 100948_at   | -1.43 |       |       |
| Hspa1a      | 100946_at   | 2.55  | 3.84  |       |
| AW112010    | 100944_at   |       |       | 2.39  |
| Itgb7       | 100906_at   |       |       | -1.05 |
| Smc6l1      | 100887_at   |       | -1.21 |       |
| Rrm1        | 100612_at   |       |       | -1.92 |
| Lyzs        | 100611_at   |       | -1.37 |       |
| Atf4        | 100599_at   |       | 1.04  |       |
|             | 100597_at   |       | -1.21 | 1.65  |
| Psme2       | 100588_at   |       |       | 1.43  |
| Anxa4       | 100584_at   |       |       | 1.13  |
| Laptrm4b    | 100571_at   |       |       | 1.09  |
| Anxa2       | 100569_at   |       |       | 1.02  |
| Dscr1       | 100555_at   |       | 1.70  |       |
| Ezh1        | 100486_at   |       |       | 1.11  |
| Mmp13       | 100484_at   |       | 2.40  |       |
| Stat5a      | 100423_f_at |       | 1.49  | 1.91  |
| Stat5a      | 100422_i_at |       | 1.31  | 1.28  |
| Mcm5        | 100156_at   |       |       | -2.29 |
| Cdc2a       | 100128_at   |       |       | -1.26 |
| Chrac1      | 100126_at   |       |       | 1.16  |
| 2810417H13R | 100116_at   |       |       | -1.55 |
| Gart        | 100066_at   |       |       | -1.26 |
| Mcm3        | 100062_at   |       |       | -1.18 |
| Idb1        | 100050_at   |       | -1.56 |       |
| Cish        | 100022_at   |       | 1.22  | 1.02  |
| Traf4       | 100005_at   |       | 1.34  |       |

Each number in the columns represents the gene expression as a log2 of the ratio encapsulated/NS or acpsular/NS. The blank indicates no significant changes in gene expression. Each data point is the average of three or four different experiments. Data shown are genes with a p-value < 0.05 and with a group difference  $\geq 1$  or  $\leq -1$ .
